# Supplementary material for: Probiotic strains improve high-fat diet-induced hypercholesterolemia through modulating gut microbiota in ways different from atorvastatin
Source: Royal Society of Chemistry journal article supplement (doi:10.1039/c9fo00444k), 2019-01-01
Supplement: c9fo00444k1.pdf [file c9fo00444k1.pdf]

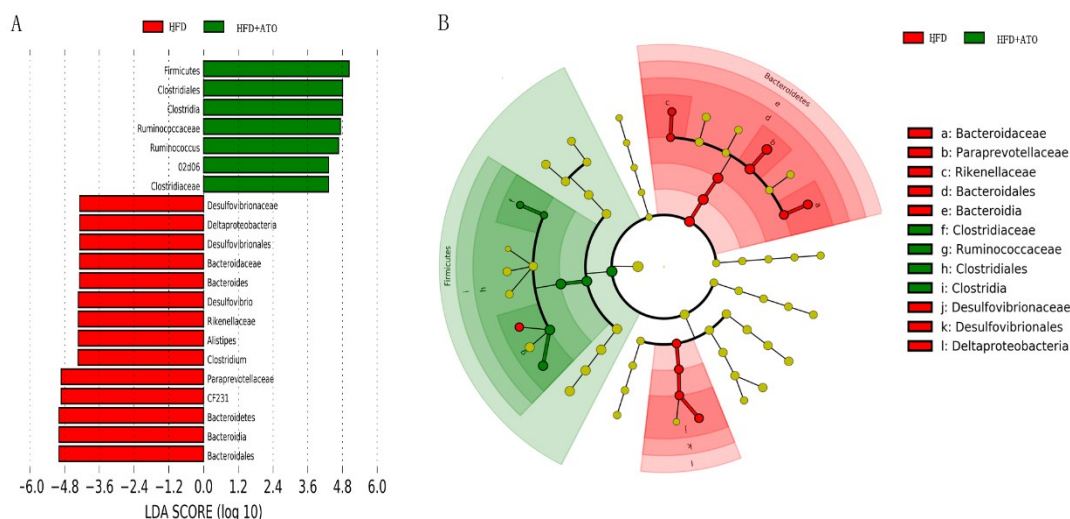

**Figure S1: The significantly different species in HFD and HFD+ATO groups using the nonparametric factorial Kruskal-Wallis rank sum test at a significance level of 0.05**

A: LAD score, an LDA score higher than 2 indicated a higher relative abundance in the corresponding group than in the other group; B: LefSe taxonomic cladogram; different colors suggested enrichment of certain taxa in HFD and HFD+ATO groups.

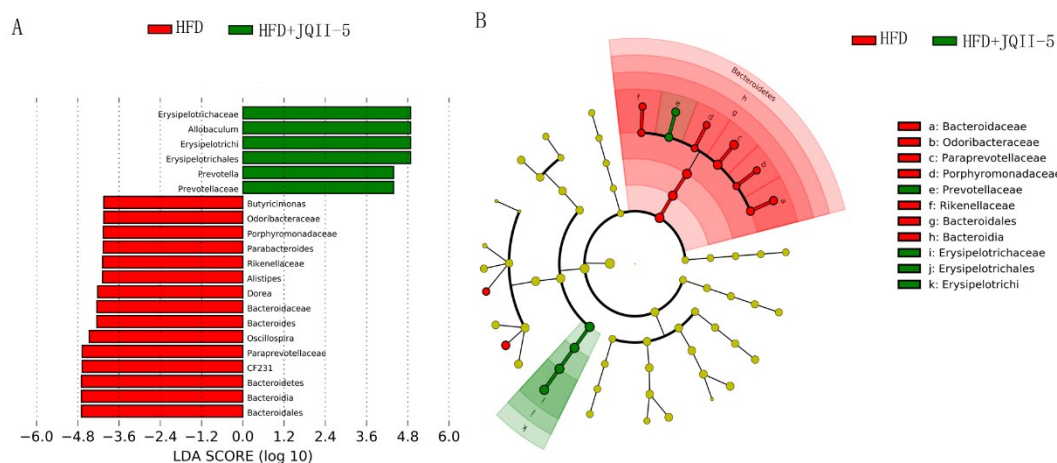

**Figure S2: The significantly different species in HFD and HFD+JQII-5 groups using the nonparametric factorial Kruskal-Wallis rank sum test at a significance level of 0.05**

A: LAD score, an LDA score higher than 2 indicated a higher relative abundance in the corresponding group than in the other group; B: LefSe taxonomic cladogram; different colors suggested enrichment of certain taxa in HFD and HFD+JQII-5 groups.

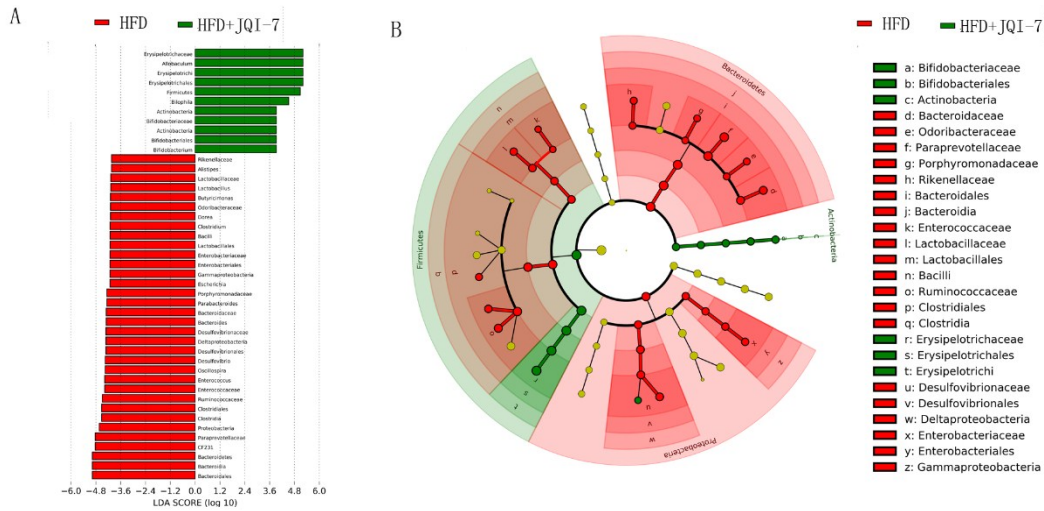

**Figure S3: The significantly different species in HFD and HFD+JQI-7 groups using the nonparametric factorial Kruskal-Wallis rank sum test at a significance level of 0.05**

A: LAD score, an LDA score higher than 2 indicated a higher relative abundance in the corresponding group than in the other group; B: LefSe taxonomic cladogram; different colors suggested enrichment of certain taxa in HFD and HFD+JQI-7 groups.

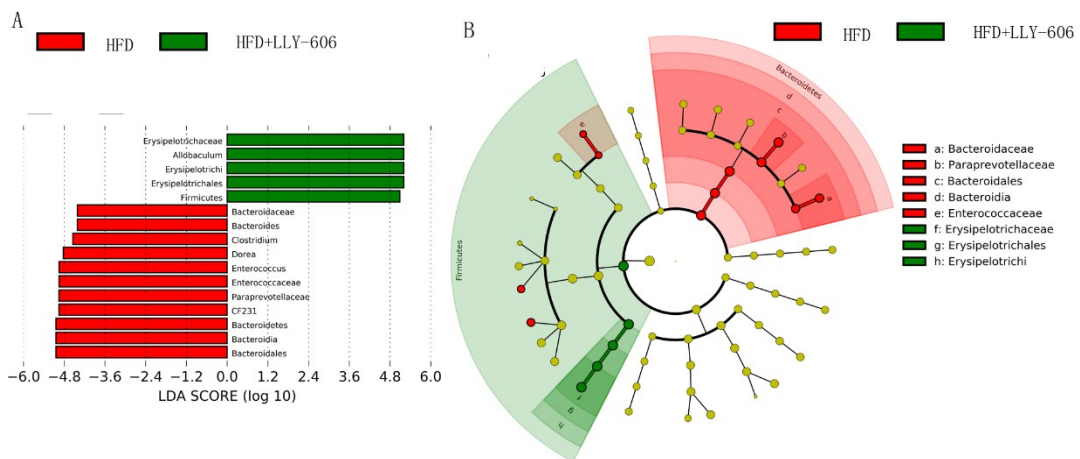

**Figure S4: The significantly different species in HFD and HFD+LLY-606 groups using the nonparametric factorial Kruskal-Wallis rank sum test at a significance level of 0.05**

A: LAD score, an LDA score higher than 2 indicated a higher relative abundance in the corresponding group than in the other group; B: LefSe taxonomic cladogram; different colors suggested enrichment of certain taxa in HFD and HFD+LLY-606 groups.

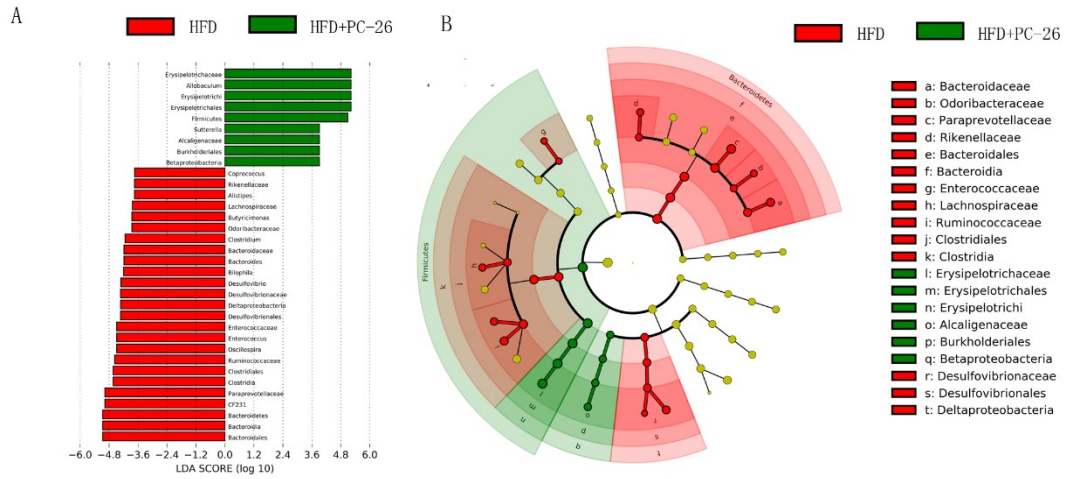

**Figure S5: The significantly different species in HFD and HFD+PC-26 groups using the nonparametric factorial Kruskal-Wallis rank sum test at a significance level of 0.05**

A: LAD score, an LDA score higher than 2 indicated a higher relative abundance in the corresponding group than in the other group; B: LefSe taxonomic cladogram; different colors suggested enrichment of certain taxa in HFD and HFD+PC-26 groups.
